# Supplementary material
Source: Preprints.org preprint supplement (doi:10.20944/preprints202106.0150.v1)
Supplement: Supplementary file 1 [file STable 1 injection summary sites.xlsx]

## Sheet: Sheet1
Supplemental Table 1: Survival and Engraftment Vary Between Injection Sites. Fish were injected in groups of 30 for each cell line and injection site, with a minimum of 3 replicates for each, for a total of > 90 fish injected per group. Total numbers and percentages alive and engrafted at day 1 and day 5 post-injection reported.
Site		Total Injected	Avg Time of Injection/30 Fish (mins)	Total D1 Alive	Total D1 Engrafted	Total D5 Alive/Eng		D1 Alive %		D1 Engrafted %		D5 Alive/ Engrafted %
Brain	Jurkat	90	10	65	57	36		0.722222		0.876923		0.553846
	DLD	93	13	87	78	39		0.935484		0.896552		0.448276
	Daoy	119	16	96	95	63		0.806723		0.989583		0.65625
	Lung	90	11	90	87	59		1		0.966667		0.655556
	Breast	90	14	90	71	49		1		0.788889		0.544444
Total		482	12.8	428	388	246		0.887967		0.906542		0.574766
Caudal Vein	Jurkat	134	22	99	88	82		0.738806		0.888889		0.828283
	DLD	170	16	153	108	64		0.9		0.705882		0.418301
	Daoy	90	24	76	53	46		0.844444		0.697368		0.605263
	Lung	105	25	100	74	65		0.952381		0.74		0.65
	Breast	90	23	87	64	58		0.966667		0.735632		0.666667
Total		589	22	515	387	315		0.874363		0.751456		0.61165
Duct	Jurkat	120	10	120	108	101		1		0.9		0.841667
	DLD	92	12	80	72	59		0.869565		0.9		0.7375
	Daoy	90	15	66	60	48		0.733333		0.909091		0.727273
	Lung	90	11	86	79	56		0.955556		0.918605		0.651163
	Breast	90	13	90	80	60		1		0.888889		0.666667
Total		482	12.2	442	399	324		0.917012		0.902715		0.733032
Eye	Jurkat	90	18	72	60	29		0.8		0.833333		0.402778
	DLD	92	20	75	64	26		0.815217		0.853333		0.346667
	Daoy	109	22	86	78	55		0.788991		0.906977		0.639535
	Lung	90	20	88	78	55		0.977778		0.886364		0.625
	Breast	90	19	90	79	58		1		0.877778		0.644444
Total		471	19.8	411	359	223		0.872611		0.873479		0.542579
Pericardium	Jurkat	185	10	152	127	93		0.821622		0.835526		0.611842
	DLD	90	12	67	58	40		0.744444		0.865672		0.597015
	Daoy	106	11	88	79	50		0.830189		0.897727		0.568182
	Lung	90	10	76	72	57		0.844444		0.947368		0.75
	Breast	129	11	127	92	67		0.984496		0.724409		0.527559
Total		600	10.8	510	428	307		0.85		0.839216		0.601961
PVS	Jurkat	120	13	109	80	47		0.908333		0.733945		0.431193
	DLD	93	12	78	75	20		0.83871		0.961538		0.25641
	Daoy	90	13	62	55	35		0.688889		0.887097		0.564516
	Lung	149	15	135	125	86		0.90604		0.925926		0.637037
	Breast	90	12	90	66	48		1		0.733333		0.533333
Total		542	13	474	401	236		0.874539		0.845992		0.49789
Yolk	Jurkat	120	7	118	99	93		0.983333		0.838983		0.788136
	DLD	90	10	74	72	33		0.822222		0.972973		0.445946
	Daoy	90	9	65	61	48		0.722222		0.938462		0.738462
	Lung	115	8	104	92	77		0.904348		0.884615		0.740385
	Breast	94	9	93	87	62		0.989362		0.935484		0.666667
Total		509	8.6	454	411	313		0.891945		0.905286		0.689427
