# Supplementary material
Source: Preprints.org preprint supplement (doi:10.20944/preprints202106.0150.v1)
Supplement: Supplementary file 2 [file STable_2 xenograft temp survival.xlsx]

## Sheet: Sheet1
Supplemental Table 2: Survival of Xenografted Fish Varies with Different Rearing Temperatures. Fish were injected in groups of 30 for each injection site, with a minimum of 2 replicates for each, for a total of 60 fish injected per group. Total number of fish remaining and percent survival were recorded over 96 hours.
HBP-ALL GFP 34C		Number Remaining					% survival
Injection Site	Total # Injected	24hr	48hr	72hr	96hr		24hr	48hr	72hr	96hr
Uninjected	60	60	59	59	59		100	98.3333	98.3333	98.3333
Yolk A	30	26	25	25	23		86.6667	83.3333	83.3333	76.6667
Yolk B	30	22	22	22	21		73.3333	73.3333	73.3333	70
Peri A	30	21	20	19	19		70	66.6667	63.3333	63.3333
Peri B	30	23	22	22	21		76.6667	73.3333	73.3333	70
HBP-ALL GFP 37C		Number Remaining					% survival
Injection Site	Total # Injected	24hr	48hr	72hr	96hr		24hr	48hr	72hr	96hr
Uninjected	60	60	60	60	60		100	100	100	100
Yolk A	30	23	22	19	17		76.6667	73.3333	63.3333	56.6667
Yolk B	30	19	19	14	13		63.3333	63.3333	46.6667	43.3333
Peri A	30	23	18	15	14		76.6667	60	50	46.6667
Peri B	30	21	17	13	11		70	56.6667	43.3333	36.6667
Jurkat GFP 34C		Number Remaining					% survival
Injection Site	Total # Injected	24hr	48hr	72hr	96hr		24hr	48hr	72hr	96hr
Uninjected
Yolk A	30	27	25	23	19		90	83.3333	76.6667	63.3333
Yolk B	30	26	23	20	17		86.6667	76.6667	66.6667	56.6667
Peri A	30	29	27	27	25		96.6667	90	90	83.3333
Peri B	30	28	28	27	23		93.3333	93.3333	90	76.6667
Jurkat GFP 37C		Number Remaining					% survival
Injection Site	Total # Injected	24hr	48hr	72hr	96hr		24hr	48hr	72hr	96hr
Uninjected
Yolk A	30	22	20	20	19		73.3333	66.6667	66.6667	63.3333
Yolk B	30	26	22	22	20		86.6667	73.3333	73.3333	66.6667
Peri A	30	23	23	23	19		76.6667	76.6667	76.6667	63.3333
Peri B	30	28	27	25	21		93.3333	90	83.3333	70
HSB2 GFP 34C		Number Remaining					% survival
Injection Site	Total # Injected	24hr	48hr	72hr	96hr		24hr	48hr	72hr	96hr
Uninjected
Yolk A	30	28	23	22	20		93.3333	76.6667	73.3333	66.6667
Yolk B	30	26	24	21	19		86.6667	80	70	63.3333
Peri A	30	29	27	27	26		96.6667	90	90	86.6667
Peri B	30	28	28	27	24		93.3333	93.3333	90	80
HSB2 GFP 37C		Number Remaining					% survival
Injection Site	Total # Injected	24hr	48hr	72hr	96hr		24hr	48hr	72hr	96hr
Uninjected
Yolk A	30	27	23	22	21		90	76.6667	73.3333	70
Yolk B	30	28	20	16	16		93.3333	66.6667	53.3333	53.3333
Peri A	30	25	22	21	19		83.3333	73.3333	70	63.3333
Peri B	30	20	18	17	14		66.6667	60	56.6667	46.6667
