# Supplementary material
Source: Preprints.org preprint supplement (doi:10.20944/preprints202106.0150.v1)
Supplement: Supplementary file 3 [file STable_3. Rearing temps_metab.xlsx]

## Sheet: Sheet 1
Supplemental Table 3: Metabolites Present in Zebrafish Larvae Vary at Different Rearing Temperatures. Amount of polar metabolites across replicate groups of larvae reared at 28C, 34C and 37C. Amounts are normalized to glutamine and total protein input.
	37_1 Polar.CDF	37_2 Polar.CDF	37_3 Polar.CDF	37_4 Polar.CDF	37_5 Polar.CDF	34_1 Polar.CDF	34_2 Polar.CDF	34_3 Polar.CDF	34_4 Polar.CDF	34_5 Polar.CDF	28_1 Polar.CDF	28_2 Polar.CDF	28_5 Polar.CDF	28_4 Polar.CDF	28_3 Polar.CDF
	37	37	37	37	37	34	34	34	34	34	28	28	28	28	28
pyruvate	2.35259	2.7693	15.8923	7.01691	29.9892	14.91	8.50778	2.51486	1.28023	25.617	5.20769	2.28304	1.71815	5.06291	2.95799
lactate	87.3	107.525	736.617	212.582	839.231	869.226	302.622	119.842	93.1819	1330.98	915.012	0.329271	97.4257	200.398	77.2227
valine 1	126.667	125.499	649.228	335.767	1423.13	724.1	413.485	152.068	145.602	1545.94	774.796	94.4664	193.818	284.225	116.29
Glycolic Acid	2.85344	4.70645	8.82771	2.78327	12.4608	7.02955	8.03421	1.96137	1.71123	16.713	5.49963	1.44806	2.52706	3.0362	1.74169
Alanine	11.9871	10.6235	66.5247	23.7768	104.902	80.7137	36.9858	15.6841	10.8566	145.768	51.1253	5.69264	11.5293	18.2266	9.05118
acetohydroxamic acid	3.77754	16.9641	33.6726	8.5989	28.5707	13.7979	12.122	5.2936	3.40769	25.8009	4.55067	0.907126	1.90121	3.65835	1.72789
2-hydroxybutyric acid	6.7068	8.44059	58.9608	19.3621	62.9864	61.9619	23.368	8.4614	4.28858	108.725	68.7175	4.98091	7.56059	16.5897	5.7342
sarcosine	1.18788	1.01806	6.91897	2.89863	12.1813	6.04098	3.91403	1.33498	1.32927	13.6039	4.72697	1.13246	2.12195	3.47204	1.56227
lactamide	0.475696	0.546724	3.47322	0.926199	3.49229	4.2855	1.57559	0.580988	0.498346	5.66986	3.47784	0.411028	0.471105	0.95218	0.393778
leucine	119.044	123.612	698.652	375.418	1620.81	715.743	446.178	147.344	159.249	1606.57	919.538	111.134	219.541	336.32	117.656
heptanoic acid	0.433862	0.474006	1.65341	0.549937	3.75454	1.3508	1.15328	0.36091	0.293814	2.20119	1.04491	0.311575	0.438365	0.445105	0.348691
n-methylalanine	10.5902	8.83861	58.8194	18.9987	128.881	48.249	41.7624	12.8591	7.33553	112.373	33.3542	4.52855	5.9672	16.596	5.2671
isoleucine	88.9311	93.5063	485.219	272.342	1196.86	498.748	325.933	108.344	121.83	1170.36	606.875	88.6153	166.698	248.64	88.885
(L)-Minosine	2.13888	1.7562	15.6079	6.38588	23.8414	13.0606	6.81552	1.40866	1.5195	36.5828	22.1563	2.79524	2.28937	6.65236	2.06796
malonic acid	0.070312	0.037476	0.351616	0.121344	0.580136	0.330159	0.259429	0.0778252	0.0773693	0.649342	0.261901	0.0194166	0.120002	0.0808059	0.0922398
beta-hydroxyisovalerate	0.639522	0.996871	4.55814	1.38786	8.46289	3.748	1.65129	0.724876	0.489154	6.76291	4.74511	0.420801	0.637429	1.38985	0.528979
valin 2	18.6805	18.0265	95.9986	44.5169	194.664	94.401	55.4663	21.3181	19.3405	215.943	88.2927	17.6839	25.5915	66.6101	15.0498
urea	119.445	138.583	110.427	318.013	1143.03	116.934	326.299	77.4777	275.44	1409.49	529.846	134.905	108.238	322.336	196.799
Serine	33.3059	32.7695	220.427	164.139	783.881	187.334	207.108	52.1737	82.253	801.27	264.51	48.1468	98.1249	163.82	49.7817
ethanolamine	71.09	64.4426	438.679	147.117	600.394	391.738	166.968	73.7079	73.8595	890.897	495.55	54.4929	91.3747	196.385	64.252
PBS	1923.34	3055.91	12710.4	3892.46	16287.6	11404.1	8135.95	1887.78	2203	23530.5	12169.7	2419.6	2499.33	5843.5	2394.98
L-threonine 1	18.8551	18.131	67.7191	26.1223	105.333	69.2245	69.3871	24.952	13.065	150.912	87.5067	9.76607	14.8104	32.3688	11.0177
Proline	0.662182	0.83956	2.63597	1.73158	6.52425	5.03071	2.12348	0.919301	0.674024	8.34824	6.25784	0.865305	0.898566	3.19409	0.907609
dihydroxypyridine	0.631701	1.01049	3.8338	0.799768	4.72634	2.81308	1.73911	0.633098	0.485266	5.65725	2.41266	0.339726	0.5387	1.2181	0.428177
Succinic Acid	12.448	13.0891	81.0474	34.874	137.309	100.226	41.9121	15.234	13.3826	192.196	77.5592	10.961	16.2758	31.2051	11.0155
glycine	70.0118	77.0559	273.571	133.629	649.348	311.676	248.55	78.8811	109.609	959.251	365.734	68.3105	118.638	240.21	96.7196
glyceric acid	0.148162	0.183077	0.380243	0.280654	0.840834	0.565168	0.388959	0.15562	0.1333	1.82403	0.805118	0.087602	0.146967	0.280248	0.0873898
glyoxylic acid	2.38055	4.84224	11.7751	4.69174	23.2828	4.62758	4.66981	2.19513	2.24812	21.5174	1.37328	0.511391	1.10079	1.57852	0.794831
uracil	2.45555	3.11862	73.1339	33.2111	120.649	74.6632	10.041	4.3747	6.58719	150.257	96.3422	3.4005	6.61503	15.332	3.65947
citraconic acid	0.654668	0.739333	3.86084	3.14865	9.52444	4.5781	2.00671	0.577746	0.826374	11.3833	4.21408	0.957972	1.06382	1.63242	0.612477
fumaric acid	16.5221	14.3175	81.8352	42.6441	183.785	116.928	47.0245	17.6905	14.8265	268.191	95.8131	14.5635	18.8581	30.6259	11.5088
seine 2	12.8875	21.7061	65.5458	60.5465	388.875	70.3285	63.3414	9.18118	53.53	300	74.794	28.1721	38.4935	49.4719	29.6934
citraconic acid 2	1.92217	3.53325	4.29429	3.94333	30.5871	16.0188	2.77627	0.206186	4.159	43.1167	1.77591	0.379078	0.54535	1.53428	2.73947
threonine	40.7427	38.4488	99.7691	49.3703	281.411	124.05	107.066	32.2619	35.4056	331.734	104.839	22.8327	29.0462	38.7355	24.2336
thymine1	0.590433	1.10129	5.86832	1.29098	4.61583	3.04297	3.44432	0.590589	0.39851	5.90504	4.11062	0.512137	0.967964	0.930573	0.554038
3-methylthion-propylamine	7.13883	43.1349	113.795	13.6854	122.107	73.9765	57.2601	14.4453	28.8133	61.7699	42.6459	28.1806	25.5087	39.3467	25.0293
benzoquinone	8.59574	14.706	39.8719	13.2712	59.9354	28.5848	23.9834	8.07203	8.0804	71.4584	12.6819	3.75146	6.58249	10.4734	5.17654
methionine	1.14843	2.12916	9.23802	2.99989	11.5088	4.70986	3.4287	1.91195	1.11366	10.4056	9.86422	1.33377	2.80006	4.26902	1.35459
aspartic acid	33.7305	26.5278	118.714	45.2348	201.683	61.7683	120.332	52.6452	27.6984	247.104	124.611	27.5281	29.7321	72.1893	31.507
Beta-alanine	2.42064	2.84049	28.1018	10.8205	51.855	31.965	9.29065	3.15357	3.20038	61.87	15.4385	1.36108	2.86681	6.06353	2.4397
capric acid	9.06915	17.89	44.6263	12.5138	55.0424	34.1575	28.4789	10.3308	9.54875	65.6441	26.4426	6.29101	8.08123	14.9549	8.11498
n-methylglutamic acid	0.0721729	0.121742	0.439954	0.11966	0.539683	0.235368	0.279272	0.0387119	0.0757586	0.702248	0.105724	0.015293	0.0551971	0.0514435	0.064966
citramalic acid	0.262216	0.290766	0.919523	0.545485	2.88472	1.20438	0.930783	0.224183	0.31031	2.77055	1.11577	0.225239	0.321856	0.46038	0.219837
Homoserine	1.99971	1.65575	5.71087	4.49723	24.8671	7.45438	5.05032	1.6903	3.12057	37.6122	7.43611	1.94192	3.35429	5.41676	2.26258
adipic acid	0.263134	0.326607	1.31365	0.275268	1.3193	0.897592	0.414222	0.223844	0.216862	2.74348	1.43904	0.16134	0.212871	0.485152	0.164511
malic acid	44.9851	46.8686	253.787	78.7534	334.89	330.158	150.527	51.2035	38.5776	574.462	227.526	40.6219	49.8532	88.0079	37.4061
n-acetyl-glutamic acid	1.56305	1.22069	6.79912	1.41999	5.77796	1.66415	2.6946	1.3188	0.928237	7.36368	2.66294	1.17659	1.05683	1.16895	0.613705
salicylic acid	0.468087	0.488386	3.44517	1.03464	3.75903	2.21846	1.34868	0.56617	0.484599	5.24268	2.08245	0.541652	0.702488	1.13176	0.440063
D-threitol	1.16124	1.81393	7.41531	5.73192	21.9658	6.23045	4.47046	1.41589	2.06084	17.7937	7.27951	1.73379	2.03381	3.6741	1.15693
aspartic acid 2	58.7292	85.0707	102.481	85.4356	503.304	152.445	269.163	56.3289	77.185	667.164	92.5805	51.0426	45.9165	68.8385	40.9241
glutamic acid 2	751.844	762.61	2370.71	1129.96	4898.13	2599.85	2775.97	857.479	1228	6859.5	2385.11	687.496	720.53	1411.54	652.393
Methionine	10.1672	17.8146	25.1563	40.9418	215.038	60.6448	60.9671	10.6967	24.0141	188.221	72.7721	17.6725	22.0083	31.5954	12.5747
cytosine	0.654974	1.06294	3.84537	1.29779	5.69705	3.44955	3.34786	0.679435	0.795271	7.53315	4.4071	0.916217	1.26846	1.86724	0.990328
glutamine	587.635	561.966	1041.75	850.41	3907.05	1342.86	2610.22	655.66	1146.37	5501.53	2120.97	687.885	508.1	960.842	499.413
phenylalanine	25.9684	46.8244	233.012	61.1493	212.067	47.4369	103.412	44.9901	36.3438	108.751	324.753	46.8698	74.746	126.834	33.9362
threonic acid	3.41394	6.53313	26.6069	5.55387	25.0747	15.2361	19.4594	4.00502	2.99427	28.8327	12.102	3.37063	6.9543	7.40359	3.66289
creatinine	163.597	240.635	1065.19	248.165	984.946	955.266	650.165	231.678	177.761	1707.17	792.101	152.988	148.025	363.742	163.95
hypotaurine	32.6752	50.1757	291.237	51.0868	187.974	208.761	126.228	51.3372	23.0815	288.49	37.4779	3.45502	7.09022	21.3611	5.75973
PEP	0.498309	0.145982	1.0855	0.356887	1.35835	0.70336	1.51872	0.380791	0.166263	4.38275	0.55994	0.160171	0.330704	0.559468	0.234327
triethanolamine	1.08815	1.53455	5.72562	1.2939	6.6842	4.09199	4.71482	1.33343	1.31969	6.46304	4.47428	0.918457	1.12792	2.1114	0.747768
n-methylanthranilic acid	2.25594	2.698	7.78081	13.4563	55.1336	21.7895	12.8415	1.97962	5.90967	64.6566	13.7846	5.42941	4.54135	6.01129	2.42826
l-asparagine	12.7281	6.78729	18.7134	15.8113	69.7026	61.7957	17.3316	2.22282	11.6477	129.484	15.6807	1.49813	2.31239	11.6334	12.809
glutamic acid	371.649	253.12	903.16	774.216	3624.03	2158.84	1444.25	401.962	400.319	5222	1626.91	412.094	482.444	791.372	318.261
lauric acid	2.04169	1.1324	7.05343	2.59213	9.6971	5.21887	2.62874	1.34177	0.888775	9.57376	5.94166	1.73045	1.51512	1.96031	0.973173
l-asparagine 2	2.8521	3.42186	7.0504	4.76027	20.5112	5.84985	16.9057	4.26578	4.14648	23.4453	7.30204	2.80486	3.02795	4.86917	1.67798
D-lyxose	0.918108	1.19003	5.49444	3.74366	13.3765	5.51337	3.26013	1.05334	1.38093	13.9542	4.91191	1.0633	1.39852	2.2666	0.840517
N-Acetyl-L-Aspartic Acid	74.7371	84.9211	285.02	141.702	580.625	270.22	277.909	84.3218	81.0737	840.044	432.952	122.359	129.753	264.859	108.436
pyrophosphate	5.03248	2.71537	17.5308	8.4035	45.4182	10.304	12.0538	2.15055	2.12654	21.4237	1.60102	3.74838	5.37835	7.63841	2.35623
ribose2	1.34526	1.74977	27.3964	10.7675	41.7996	24.4519	4.28241	2.063	2.81004	37.146	30.1872	1.40939	3.20388	8.12135	1.25292
n-acetyl-cysteine	0.939213	0.710899	3.83554	1.53486	8.16376	3.44347	3.36054	0.959371	1.02021	6.32292	4.03962	0.708187	0.540532	1.37251	0.664749
biuret	0.878724	0.149305	0.744437	0.184185	0.911665	0.464416	0.383723	0.18044	0.122719	1.11496	0.276073	0.0472427	0.129977	0.17839	0.098946
xylotol	0.877169	1.10957	8.4544	2.29161	9.73864	8.25945	2.49783	1.00429	0.702044	13.3568	8.35531	0.761858	0.830183	1.85972	0.679748
putrescine	10.0603	14.9846	22.4877	41.9302	208.338	48.5036	37.2624	12.5545	43.0501	170.69	59.496	20.7034	22.176	42.6606	16.8144
DHAP1	0.68854	1.26547	4.02219	0.468841	2.7226	2.67501	2.2034	1.08128	0.681494	5.0292	1.30568	0.379825	0.821138	1.19642	0.401861
Dihydroxyacetone Phosphate	15.5037	13.1865	86.4818	34.3067	143.333	104.158	58.8951	16.5647	19.8883	221.683	84.9614	10.1383	14.3764	33.7563	12.08
glycerol-1-phosphate	59.6253	51.1947	334.472	131.345	552.736	399.246	226.941	62.3812	76.368	850.588	327.002	39.1984	55.1787	129.071	46.78
dihydroorotic acid	0.670238	0.709265	3.31809	1.25926	5.20542	3.36502	1.76171	0.781246	0.764945	5.70561	2.68661	0.35859	0.643177	1.11237	0.540805
o-phosphocolamine	37.0996	47.3665	363.746	74.3574	301.49	217.028	139.984	31.0343	30.3987	386.425	60.4553	10.4593	23.1276	46.3429	15.0036
Glutamine	5.0937	23.5878	5.21945	8.55536	50.4376	5.33583	52.4495	4.12291	16.8345	41.4008	6.15311	10.8975	5.03669	5.48412	6.45059
hypoxanthine	292.061	279.783	1560.12	786.997	2673.13	1580.67	1009.75	296.217	392.387	4039.94	2190.68	226.362	352.099	647.688	235.463
L-theanine	72.5858	93.3972	332.823	307.461	1312.72	225.145	405.388	47.6838	145.685	1463.87	119.716	102.728	196.555	303.591	91.9705
3-Phosphoglyceric acid	2.16163	1.37833	9.27344	2.00075	6.0554	9.09611	7.39445	1.22498	0.68516	15.348	7.83548	2.29444	1.31394	2.94407	1.25049
glucosamine 1 phosphate	4.93117	7.38227	48.3939	12.7905	48.7894	39.2416	20.3963	5.99143	7.47719	72.4415	33.1851	6.04805	7.06616	16.0055	6.33497
citrate	72.5858	93.3972	332.823	307.461	1312.72	225.145	405.388	47.6838	145.685	1463.87	119.716	102.728	196.555	303.591	91.9705
n-carbamyl-glutamic acid	16.3989	20.7877	128.027	37.8437	135.707	109.448	62.8557	21.6213	19.232	192.447	102.62	16.2234	19.0744	42.9294	15.0897
dehydroascorbic acid	15.9393	18.9713	111.546	53.1645	212.588	105.846	41.196	20.5957	23.5296	253.199	101.28	14.7254	11.8876	40.9714	12.609
tyrosine2	199.28	209.403	722.835	1055.08	4492.41	770.342	929.454	202.887	574.811	4050.73	846.475	623.438	682.649	1329.45	317.54
erythrose-4-phosphate	7.81898	10.078	69.6257	20.091	74.9001	49.079	28.11	10.4603	9.14943	98.3984	25.1087	4.43173	8.40419	16.8148	4.99667
fructose	4.00896	5.51697	48.385	5.15411	46.1598	15.8285	11.6757	5.72193	8.83112	35.936	18.2005	4.16899	3.24727	6.86454	3.10684
mannose	25.5685	31.5791	100.072	34.7245	117.42	104.468	92.3301	28.4322	17.8063	196.499	69.2298	16.7387	20.2652	35.3584	14.0017
Galactose	0.500122	0.484246	7.95112	2.00266	10.0184	7.3299	2.80429	0.642328	1.53675	8.67167	6.4785	0.763384	1.15043	1.24477	0.815608
glucose	527.857	770.223	2585.69	529.533	1816.84	2704.3	1965.78	665.979	371.478	4745.93	1767.07	377.571	401.041	836.289	387.873
Lysine	8.97361	16.9464	91.4909	22.177	93.072	79.6856	44.048	12.1512	11.8196	111.977	115.482	7.29204	9.72881	23.4977	8.23081
N-Acetyl-L-lysine	0.619665	1.7465	9.43104	3.59165	11.9907	8.15858	2.65189	0.86009	0.862976	14.0646	5.85946	1.03213	0.979882	2.93584	0.447188
galacturonic acid 1	11.3927	17.0336	225.647	54.7944	200.438	154.343	50.0835	20.4756	10.2902	314.19	73.9942	8.34456	12.5511	37.9804	8.9599
tyrosine	99.5431	158.327	551.221	1354.57	5712.4	542.712	650.194	117.12	464.968	3690.28	425.012	418.937	843.377	1314.99	185.763
unknown sugar 1 18.16	2.38126	3.59121	18.4736	7.01672	26.7487	2.15002	11.7222	3.43882	2.40028	42.3866	12.535	2.66774	2.48956	6.25972	1.8327
inknow sugar 2	1.99903	2.54695	11.5271	3.13578	14.2312	11.5759	7.70983	2.38489	1.58713	25.6482	7.13212	1.50274	1.96701	3.16235	1.33555
palmitoleic acid	0.623009	0.730128	4.68161	1.26132	3.85776	3.15481	1.29393	0.604511	0.393678	6.66123	5.45768	0.550743	0.922572	1.19602	0.421651
Pantothenic acid	5.71287	8.4834	65.5238	29.9052	100.739	49.1956	25.0517	7.07228	12.2792	125.032	44.535	6.97602	10.8134	16.2928	4.06457
saccharic acid	0.260755	0.254052	1.99302	0.618538	2.97849	1.72949	0.977635	0.243941	0.305145	2.8433	1.51273	0.357356	0.467245	0.941337	0.278366
uknown sugar 3	1.39625	2.17235	7.65676	1.51956	5.17923	5.52482	4.50381	1.75108	0.891385	11.8285	2.95361	0.73361	0.87363	1.52202	0.708818
Palmitic Acid	38.9454	56.4317	280.811	76.9008	228.803	210.347	105.326	28.5689	19.709	434.433	298.362	39.9967	42.1334	78.0694	33.9789
uric acid	145.654	153.398	922.471	418.129	1718.93	946.959	676.038	216.529	201.6	2332.8	788.258	77.5475	200.758	316.342	92.8807
a-acetyl-histidine	42.6997	30.7442	183.367	109.66	446.192	207.165	180.558	51.1262	58.6211	680.555	333.706	51.7055	91.4692	151.325	51.8755
N-Acetyl-D-Glucosamine	0.507189	0.44007	7.98553	3.5037	11.9259	7.94336	1.82344	0.678107	0.743451	15.7735	8.15662	0.401255	0.916993	1.70357	0.392401
myo-inositol	49.9686	52.2037	385.182	113.727	476.207	459.188	210.716	78.0901	60.1528	727.903	356.486	29.0282	40.5997	91.513	31.5361
isoxanthopterin	5.05151	5.40928	41.8819	14.2886	60.7211	36.1779	15.9897	5.52627	8.05052	65.1022	39.0386	3.51259	9.36012	16.4224	4.84796
N-Acetylgalactosamine	0.375398	0.461967	7.37107	2.29449	8.6619	5.77807	1.47931	0.589693	0.463938	10.3299	6.54681	0.414405	0.475276	1.21826	0.374348
ribose-5-phosphate	0.435393	0.540079	3.8578	1.42871	4.31917	4.83088	1.69749	0.582964	0.532671	6.54322	4.04841	0.597044	0.454425	1.23892	0.513711
unknow sugar 5	0.628898	0.957816	7.92553	4.61933	18.6096	5.73503	3.18949	1.03417	1.13854	16.9199	7.0597	0.955797	1.69051	3.19915	0.509489
norepinephrine	1.43484	1.66409	7.53069	6.00064	26.8685	6.71692	7.27282	1.50588	2.77305	24.9226	7.19532	1.77961	3.60841	5.91719	1.64077
GSSG	4.59893	5.11972	17.8919	3.97419	24.4087	15.1634	18.9924	5.38723	5.12329	38.6468	16.6714	3.5348	6.42087	19.6563	6.36721
tryptophan	62.5748	79.0835	390.56	396.152	1307.36	411.619	347.973	88.9149	164.538	1253.81	492.033	128.558	185.23	322.96	61.6247
5hydroxyindole-3-acetic acid	3.89658	7.41076	36.4404	6.66623	21.807	18.5066	13.3621	5.17113	3.32213	46.0336	8.80428	2.06553	3.95675	6.72976	2.82749
Linoleic Acid	1.92118	0.83542	23.008	2.21344	5.10498	12.7761	1.55685	0.788223	0.300202	20.9542	29.3646	1.54956	1.11857	2.79971	1.48982
oleic acid	13.0596	6.78282	183.753	16.0762	40.3859	108.549	13.8049	5.80475	2.26023	169.454	221.063	11.4192	11.4125	22.0272	9.18078
2,3-diphosphoglycerate	2.74907	3.45923	21.4933	15.7473	57.2113	22.4979	12.0343	2.47948	3.01674	79.4472	25.4722	4.85678	4.89682	9.66631	3.283
stearic acid	16.2135	23.2748	102.552	41.4738	125.118	95.5569	45.9505	11.3557	9.82926	223.581	119.531	18.0178	17.6315	34.8556	15.8895
ferulic acid	0.677775	0.801103	17.2863	2.9718	10.3842	8.10862	3.4061	1.19751	0.670997	21.952	3.18206	0.439276	0.616185	1.82767	0.491467
Fructose-6-phosphate	8.53334	5.70032	29.1414	5.72208	19.335	30.4843	32.1083	10.306	5.9904	46.2703	20.4691	8.24839	10.9055	14.827	3.55316
Glucose-6-Phosphate	22.5304	11.9242	54.2232	12.1971	45.9923	62.3104	79.1036	25.8532	14.9132	113.012	43.4599	18.6012	25.9831	41.1317	10.3389
Pyridoxal-5'-phosphate	0.255196	0.487841	1.65861	0.539538	1.6516	1.06619	0.656748	0.354489	0.333832	3.05244	2.30198	0.0944855	0.366854	0.502247	0.153883
5-hydroxy-tryptophan	1.24663	0.915601	7.04143	3.3239	11.9668	16.4733	8.61425	1.432	1.5277	19.4904	56.0156	9.4778	12.731	15.9001	6.05358
arachidic acid	1.03546	1.00613	6.3476	3.82827	12.2931	6.17536	2.4575	0.550704	0.840731	19.652	7.29906	1.24205	1.11268	2.38017	1.06449
6-Phosphogluconic acid	3.81284	4.51596	27.9418	9.4106	37.2884	25.3749	15.6778	2.81964	3.91562	65.6689	24.2227	5.82609	5.70807	10.7268	3.72651
cytidine	0.413675	0.275459	2.28377	0.967794	4.6707	2.63507	1.25847	0.357669	0.53231	7.93015	3.29275	0.547724	0.866586	1.40987	0.506166
Uridine	1.1836	1.40344	11.4423	8.35386	29.2336	9.55969	4.80752	1.488	2.08344	34.987	8.00484	1.75172	2.86109	4.67685	1.43785
S7P	0.163473	0.110412	1.43495	0.484888	2.18539	1.54992	0.56525	0.183866	0.153072	2.80383	1.95859	0.15608	0.197628	0.40213	0.147775
3,7-dihydroxyflavone	12.1405	9.85444	79.9205	40.7747	124.942	74.44	30.7586	6.54645	9.04626	211.918	47.9574	8.32154	7.09848	14.5213	5.57894
F1,6BP	2.42816	1.82358	11.8082	3.17659	12.4195	12.1193	8.49969	2.50822	2.40564	21.7036	14.3967	2.90275	3.07382	5.95842	2.27055
inknown sugar 7	1.63183	1.71649	9.26882	1.75518	6.75457	8.1804	6.77813	2.38625	1.60218	13.5483	7.29439	0.736824	0.934688	1.50904	0.799382
inosine	2.67688	2.04233	30.7118	22.5898	79.9392	38.5755	7.9021	2.82677	5.94197	91.284	61.4075	3.21118	5.2362	8.98188	2.65531
n-acetyl-neuraminic acid	1.1726	1.32593	9.72872	2.68688	9.21864	11.3815	4.78299	1.65298	0.93268	16.6998	6.1884	0.66195	1.11499	2.29201	0.773246
adenosine	0.731033	0.864616	3.6791	2.04216	7.21366	3.58787	2.13523	0.850428	0.652279	13.1416	3.41633	0.620747	1.24029	1.28134	0.472156
D-sphingosine	0.536421	2.03231	5.68846	1.28391	4.34041	5.62903	1.18194	0.523167	0.871835	6.74018	6.35889	1.09165	0.537883	1.94678	0.398329
sucrose	7.76813	15.4149	301.03	12.3632	277.102	58.1788	25.3019	23.5089	59.3429	80.357	72.7782	18.4267	16.8386	32.6777	12.9014
xanthosine	0.0189619	0.0199908	0.0870366	0.138475	0.738849	0.159893	0.090304	0	0.0120803	0.682408	0.356712	0.0452946	0.0184554	0.0942603	0.0203281
monoolein	0.423215	0.403357	3.73187	1.43039	4.90551	3.34224	1.46011	0.30738	0.369323	7.06257	4.12706	0.588213	0.685047	1.28617	0.391293
lactose	0.688705	0.727077	4.7432	0.618501	5.53679	2.28714	1.40196	0.536225	0.819876	3.85596	5.32942	0.542658	0.484517	2.08362	0.5188
monostearin	5.79407	5.41364	43.876	16.0078	58.0048	43.7301	15.516	3.89697	4.54929	86.2486	45.9464	6.05921	6.28337	13.809	5.34512
guanosine	0.24429	0.072065	1.54902	1.10081	3.7674	1.36415	0.796568	0.234402	0.398427	4.98435	2.99556	0.205173	0.675946	0.647792	0.0868509
cellobiose	0.0826078	0.0413979	206.313	30.6943	76.2998	268.485	54.0532	17.3399	15.2125	249.761	0.422046	39.4932	18.1748	0.176887	8.60863
maltose	5.85863	12.4679	57.6114	8.99282	23.249	69.3123	14.1696	4.68896	3.98113	73.2516	56.0816	8.84631	4.122	9.3863	2.15909
UMP	0.266668	0.599234	1.54121	7.0254	19.1509	4.80489	1.50641	0.151082	0.59957	23.2511	2.43335	1.14902	1.0213	0.665125	0.219867
UDP	0.884919	0.731435	7.37772	2.13623	8.03697	8.8295	4.87118	1.00963	1.0228	15.6264	4.18021	0.809393	1.81584	4.09562	1.12999
UTP	0.884919	0.731435	7.37772	2.13623	8.03697	8.8295	4.87118	1.00963	1.0228	15.6264	4.18021	0.809393	1.81584	4.09562	1.12999
isomaltose	0.254607	0.153989	1.45765	0.359991	1.72553	2.08826	0.82771	0.176488	0.132605	1.95733	2.57833	0.199686	0.25243	0.494174	0.124394
IMP	7.30444	5.07146	111.65	105.081	490.712	228.445	77.6274	8.50879	28.5349	528.88	75.8296	3.24813	21.284	17.9949	6.77653
ATP	7.19734	9.11886	86.7886	32.802	159.297	129.486	92.8528	15.9566	23.0779	254.655	62.0227	7.5904	27.9761	39.6952	11.5394
5-b-cholestain-3-a-7-a-12-a-triol	0.806669	0.63001	4.71689	2.6372	8.93252	6.90459	4.04641	0.51335	0.692741	10.3953	4.15271	1.14678	1.42726	1.14339	0.720943
alpha-tocophereol	1.38424	1.3268	28.3057	18.9456	73.7806	30.762	5.33611	1.83169	2.26976	85.0663	32.2542	2.79846	3.22857	15.1858	1.34776
5a-cholestan-3-b-ol	0.455226	0.586216	4.95024	1.7443	5.13955	5.2662	1.36586	0.296668	0.610929	8.57846	3.98591	0.513274	0.591277	1.20156	0.283635
Guanosine-monophosphate	1.97345	2.63644	16.0539	7.54339	25.2605	14.7104	6.69324	1.50328	2.20908	33.3973	17.8638	3.28738	2.59505	6.97455	2.09786
cholesterol	213.557	260.075	1711.54	767.66	2536.71	1639.22	691.304	149.019	227.897	3682.67	1804.27	326.775	266.7	638.724	222.281
Maltotriose	1.85947	1.84754	3.29192	1.03067	7.25659	3.86401	6.59403	2.20356	1.15785	13.9724	2.91974	0.0462362	1.42208	1.76277	0.418597
