# Supplementary material
Source: Preprints.org preprint supplement (doi:10.20944/preprints202106.0150.v1)
Supplement: Supplementary file 4 [file STable_4. Jurkat culture 34C 37C.xlsx]

## Sheet: Sheet1
Supplemental Table 5: Metabolite composition of Jurkat cells grown at 34C and 37C. Normalized polar metabolite amounts multiplied by factor of 10^6 across two groups and three replicate samples in Jurkat cells cultured at 34C or 37C.
	37C Polar			34C Polar
Metabolite	sample 1	sample 2	sample 3	sample 1	sample 2	sample 3
glutamate-cntrl	5.32836	6.85815	6.82729	6.26822	6.91112	7.17375
lactate	283.534	135.663	334.407	172.56	321.548	459.177
pyruvate new	0.994893	0.485461	1.25204	0.779196	1.5501	2.75028
glycolic acid	0.610591	0.174144	0.576488	0.382839	0.770555	1.57931
alanine 1	119.91	32.6555	150.02	49.1741	78.6245	107.653
oxalic acid	7.10075	4.18568	7.08384	4.39954	8.91285	19.5979
norvaline 1	103.005	37.7525	100.343	71.8881	127.51	219.602
acetohydroxamic acid	17.7454	10.0118	16.7623	10.6053	20.7261	46.562
leucine	31.8037	12.8514	35.467	14.2554	27.3515	41.2389
minosine 1	0.756913	0.0772076	1.39693	0.32881	1.02885	1.05849
valine 2	0.815859	0.250705	0.904568	0.593409	0.7398	1.32473
norvaline2	17.0722	5.76059	18.9406	22.1457	25.6473	57.2386
serine	4.38078	1.03896	5.24456	4.77323	10.9104	10.8248
ethanolamine	3.49626	0.148538	1.04617	1.11553	0.851101	1.72471
itaconic acid	0.502962	0.116562	0.409878	0.388787	0.578974	1.41058
PBS	1760.17	588.569	1719.71	1168.92	1754.98	2896.66
glycerol	33.157	10.7146	34.0202	23.7109	42.3112	60.79
isoleucine	10.2219	3.93541	12.0186	7.3263	8.94784	18.4575
threonine	13.9399	4.75177	16.1456	7.10243	14.2054	19.4629
proline	7.85009	2.10594	11.0247	4.1836	6.06046	11.0425
glycine	188.477	47.8675	203.032	127.372	193.7	545.746
succinic acid	1.59912	0.6689	2.05357	1.3603	2.10995	3.47668
succinc acid	1.59912	0.6689	2.05357	1.3603	2.10995	3.47668
glyceric acid	0.0828757	0.0117546	0.124272	0.0519103	0.0705873	0.127605
glyoxylic acid	2.85938	1.05406	2.67794	1.75612	3.14585	6.60882
fumaric acid	13.1647	3.23775	16.9363	10.5584	16.5899	25.7001
thymine	0.519922	0.32509	0.608755	0.425602	0.928209	1.50353
Citraconic acid	0.326563	0.137638	0.183531	0.230893	0.158711	0.61266
threonine 2	5.85212	0.959477	4.60073	3.2667	3.36757	8.11314
acetyl-serine	1.70801	0.366749	1.77961	1.43632	1.47467	3.48251
dihydro-methyluracil	0	0	0	0	0	0
glutaconic acid	0.060373	0.0292053	0	0.0880042	0.0762272	0.179907
beta-alanine	15.4	5.28422	15.3811	14.5515	20.5887	39.2452
oxalacetic acid	10.8922	4.24906	12.0558	8.54502	14.7842	29.7817
aminoisobutyric acid	3.56453	0.0462935	1.71802	0.862919	1.61672	0.931042
citraconic acid	9.89717	3.64841	10.46	7.39488	13.4276	26.2548
homoserine	1.5641	0.252854	1.70946	0.823401	1.2941	3.54662
malic acid	29.4922	12.2544	35.3124	24.1908	41.7671	73.1744
threitol	2.68649	1.34888	3.14599	2.10111	3.40423	5.78128
methionine	20.5711	7.34537	21.7338	8.75496	21.9617	38.7148
aspartic acid	4.20531	0.856301	5.81667	2.48638	4.93476	7.24937
glutamic acid 3	260.125	88.4402	320.157	140.994	316.58	468.53
gaba	1.53348	0.450041	1.87579	1.5934	2.05866	3.95764
cytosine	0	0	0	0	0	0
phenylalanine	6.49987	0.576468	2.83969	3.279	2.6735	7.42219
cysteine	0.360537	0.200528	0.417894	0.168213	0.315748	0.535467
creatinine	0.799668	0.332987	1.27314	0.510046	0.80228	1.25084
threonic acid	0.790997	1.11612	1.97307	1.59255	2.96378	5.82004
aKG2	1.95976	1.25345	2.47359	1.33651	2.01865	3.8409
aKG	0.974366	0.515287	1.22511	0.529017	1.03854	1.93408
hypotaurine	7.88681	8.4809	16.9315	12.9272	20.771	52.4791
glutamic acid	159.957	0.650595	218.963	215.244	29.9779	39.5797
triethanolamine	0.189901	0.0738159	0.145441	0.182903	0.806246	0.142256
asparagine	3.87782	1.54053	2.85853	1.35796	2.76321	3.93826
n-acetyl-aspartic acid	7.64449	3.33823	8.87565	4.60993	9.0772	13.218
xylose/arabinose	0.872226	0.126038	0.881002	0.458676	0.767559	1.26329
pyrophosphate	6.72408	2.06837	7.63601	4.89507	9.23362	15.9897
ribose	1.31042	0.185252	1.12002	0.644824	1.07185	1.67036
methyl glutamic acid	0	0	0	0	0	0
arabitol	0.638198	0.226005	0.585394	0.76793	1.1516	1.85342
ribitol	0.638198	0.226005	0.585394	0.76793	1.1516	1.85342
fucose	4.38907	0.326204	3.36082	2.10651	3.30808	4.13471
glyceraldehyde-3-phosphate	0.522885	0.339719	1.14695	2.27166	3.72843	7.3702
DHAP	0.248847	0.08759	0.553058	1.05853	1.91114	3.84815
glycerol-1-phosphate 1	77.8004	30.2361	95.2505	61.7043	105.766	170.908
glycerol-1-phosphate	13.6546	5.29874	17.0348	10.9272	19.1158	29.685
o-phosphocolamine	77.7106	30.2775	95.6112	61.9195	106.143	171.224
3PG	0.780129	0.147295	0.460505	0.12892	0.349147	0.568865
citric acid	34.2316	11.0525	38.0198	40.6569	70.9751	108.976
glucosamine phosphate	2.62233	0.816661	3.0461	3.04671	5.25562	8.19868
myristic acid	2.48419	0.200761	2.499	0.729674	1.48031	2.9787
lysine	0.260647	0.0420991	0.203946	0.240806	0.134653	0.350834
dehydroascorbic acid	0.0700876	0.359526	0.616701	0.471248	0.305085	0.552796
unknown hexose 1	0.048024	0.184682	0.247585	0.201738	0.374527	0.638024
unknown hexose 2	1.00444	0.677832	1.69507	1.38756	2.44879	3.30559
unknown hexose 3	0.672226	0.47948	1.19997	1.00238	1.83553	2.52453
mannose	17.5708	1.53196	7.12433	6.56535	12.4572	12.6066
galactoise	17.5708	1.51945	7.18065	6.60442	12.5622	12.6066
E4P	0.0990667	0.0708902	0.11612	0.190338	0.279441	0.373362
glucose	17.5708	1.53196	7.12433	6.56535	12.4572	12.6066
glucose 2	17.5967	1.53281	7.16201	6.59374	12.4969	12.7387
tyrosine	1.8001	0.301141	1.22525	0.937856	1.30987	1.59411
galacosamine	12.2365	1.36915	7.80797	6.29764	7.7779	11.8642
glucosamine	12.2365	1.36915	7.80797	6.29764	7.7779	11.8642
disaccharide 1	0.0255762	0	0	0	0	0
disaccharide 2	0.0225027	0	0	0	0	0
pantothenic acid	0.573379	0.311005	0.798999	0.501935	1.02347	1.3085
palmitoleic acid	0.655432	0.0638996	0.737342	0.287444	0.542491	0.472138
palmitic acid	19.9543	2.28689	25.175	6.605	19.2186	52.1302
saccharic acid	0.245115	0.149263	0.452901	0.171908	0.302353	0.635976
NAM	0.278375	0.105999	0.356511	0.124143	0.263755	0.338704
n-acetyl-glucosamine	10.9778	3.83338	13.0572	5.63132	10.7077	15.4277
myo-inositol	390.306	136.572	468.493	208.33	395.738	580.667
ribose-5-phosphate	11.7929	0.221448	8.86866	4.92342	9.11536	8.22657
unknow sugar phosphate	0.303292	0.0483648	0.455161	0.758783	1.33384	1.52338
glutathioine	15.9945	5.51918	33.3463	13.4119	41.8225	40.5112
linolric acid	0	0	0	0	0	0
oleic acid	1.42541	0.175232	1.81174	0.544428	1.35808	2.04498
stearic acid	12.4199	0.919579	14.4595	3.23043	10.6987	26.1604
fructose 6 phosphate	0.126015	0.0711232	0.31938	0.332551	0.510326	0.378876
glucose-6-phosphate	0.295114	0.0386297	0.244639	0.307902	0.447229	0.257415
unknown hexose phosphate	0.295114	0.0386297	0.244639	0.307902	0.447229	0.257415
6PG	1.818	0.0823341	3.64568	0.854403	0.233176	3.06173
S7P	1.818	0.0823341	3.64568	0.854403	2.80366	3.06173
inosine	0.109385	0.0620354	0.230869	0.135994	0.244456	0.673154
nacetyl-neuraminic acid	0.16652	0	0.18538	0.0424475	0.149634	0
disaccharide 4	0.350383	0.109442	0.502157	0.550195	1.68616	0.373047
disaccharide (sucrose?)	0.350383	0.109442	0.502157	0.550195	1.68616	0.373047
disaccharide 3	0.350383	0.109442	0.502157	0.550195	1.68616	0.373047
cellobiose	3.76838	0.0381896	0.229019	0.134913	0.36448	0.126502
fructose-1-6-bisphosphate	0	0	0.028636	0.15483	0.125136	0.090111
monostearin	9.03812	1.00543	30.1951	5.38083	20.212	20.4513
maltose	3.76838	0.014033	0.151332	0.0580837	0.496754	0.170455
disaccharide 6	1.0444	0.0496335	0.245598	0.0695292	0.164792	0.170455
inosine5 monophosphate	0.376508	0.0708384	0.243337	0.118601	0.125312	0.262141
AXP	4.30438	0.134608	1.29746	0.617201	0.384749	0.585879
cholesterol	30.3739	2.54456	78.6089	13.5968	51.7383	54.5137
maltotriose	0	0	0	0	0	0
tri-sugar1	0	0	0	0	0	0
trisugar 2	0.0419318	0	0	0	0	0
