# Supplementary material
Source: Preprints.org preprint supplement (doi:10.20944/preprints202106.0150.v1)
Supplement: Supplementary file 5 [file STable_5. Whole vs deyolked_metab.xlsx]

## Sheet: Sheet1
Supplemental Table 5: Metabolite composition varies across whole body and yolk depleted tissue. Normalized polar metabolite amounts multiplied by factor of 10^6. Yolk contribution to whole is determined as the difference between whole (average) and de-yolked bodies (individual samples).
	Body with yolk (whole)				Body without yolk				Yolk fraction relative to whole AVG
Metabolite	Sample 1	Sample 2	Sample 3	AVG	Sample 1	Sample 2	Sample 3	AVG	Sample 1	Sample 2	Sample 3	AVG
glutamatic acid pellet	1.05336	1.64641	3.6969	2.13222	1.44009	2.04741	2.60904	2.03218	0.69213	0.0848143	-0.476814	0.100043
lactate	0.291639	0.498716	2.39636	1.06224	1.84405	2.46362	0.668344	1.65867	-0.781812	-1.40138	0.393895	-0.596431
pyruvate new	0.0117753	0.0209602	0.0226786	0.0184713	0.0222625	0.17704	0.0515326	0.0836115	-0.00379112	-0.158568	-0.0330613	-0.0651402
glycolic acid	0.00202799	0.0038251	0.00883932	0.00489747	0.00792023	0.0311691	0.0111666	0.016752	-0.00302276	-0.0262717	-0.00626911	-0.0118545
alanine 1	0.476569	0.431784	3.04786	1.31874	0.294034	0.806755	0.39444	0.49841	1.0247	0.511982	0.924296	0.820327
norvaline 1	0.5156	0.68072	0.297574	0.497965	0.866246	4.70739	1.00563	2.19309	-0.368281	-4.20942	-0.507665	-1.69512
acetohydroxamic acid	0.0262226	0.0639744	0.0428688	0.0443553	0.0494213	1.07155	0.240189	0.453719	-0.00506601	-1.02719	-0.195834	-0.409364
oxalic acid	0.223804	0.595831	0.258233	0.359289	0.619028	1.68084	0.309938	0.869935	-0.259739	-1.32155	0.0493511	-0.510646
malonic acid	0.00410594	0.00444712	0.0166324	0.00839517	0.00166164	0	0.00230626	0.00132263	0.00673353	0.00839517	0.00608891	0.00707254
leucine 1	0.324937	0.184451	0.338218	0.282535	0.2275	0.127915	0.195407	0.183607	0.0550353	0.15462	0.0871279	0.0989278
2-ethyhexanoic acid	0.000955338	0.00181	0.00204509	0.00160348	0.00166164	0.00532979	0.00534453	0.00411199	-5.81614e-05	-0.00372631	-0.00374105	-0.00250851
lactamide 2	0.0225278	0.033526	0.038662	0.0315719	0.043366	0.238771	0.0780191	0.120052	-0.0117941	-0.207199	-0.0464472	-0.08848
minosine 1	0.00861868	0.00450652	0.0232287	0.012118	0.0167973	0.00437563	0.000949789	0.00737423	-0.00467932	0.00774232	0.0111682	0.00474372
valine 2	0.0817523	0.0537543	0.587909	0.241139	0.0592876	0.124918	0.0277013	0.0706355	0.181851	0.116221	0.213437	0.170503
serine 1	0.00256621	0.00299463	0.00637399	0.00397828	0.00251741	0.0212999	0.0069004	0.0102392	0.00146087	-0.0173216	-0.00292212	-0.00626095
ethanolamine	0.101695	0.059581	0.374574	0.178617	0.164911	0.413565	0.247242	0.275239	0.0137054	-0.234948	-0.0686248	-0.0966224
PBS	20.7847	17.1287	54.2075	30.707	37.8358	14.5323	11.5107	21.293	-7.12884	16.1746	19.1963	9.41401
proline1	0	0.000524509	0.00113641	0.000553638	0	0.00364315	0	0.00121438	0.000553638	-0.00308951	0.000553638	-0.000660744
glycine1	0.0428745	0.0813078	0.44048	0.188221	0.121963	0.104022	0.028045	0.0846769	0.0662575	0.0841983	0.160176	0.103544
succinic acid	0.0137413	0.0262591	0.0642053	0.0347352	0.0212582	0.0444792	0.03006	0.0319325	0.013477	-0.00974393	0.0046752	0.00280275
glyceric acid	0.00126057	0.00166991	0.00697685	0.00330244	0.00451961	0.0117005	0.00749598	0.00790536	-0.00121716	-0.00839803	-0.00419354	-0.00460291
glyoxylic acid	0.00417166	0.00874629	0.0218876	0.0116019	0.0168684	0.0894884	0.0101223	0.0388264	-0.00526651	-0.0778865	0.00147953	-0.0272245
uracil	0.00862139	0.00922709	0.0250823	0.0143103	0.0165104	0	0	0.00550345	-0.00220008	0.0143103	0.0143103	0.00880682
fumaric acid	0.0120104	0.00788444	0.0349382	0.0182777	0.0187596	0.0409613	0.0371808	0.0323006	-0.000481876	-0.0226836	-0.0189031	-0.0140229
thymine	0.0066412	0.0102459	0.0350922	0.0173264	0.0158916	0	0.000955036	0.00561555	0.0014348	0.0173264	0.0163714	0.0117109
theronine	0.0123656	0.00257659	0.0402748	0.0184057	0.00422645	0	0	0.00140882	0.0141792	0.0184057	0.0184057	0.0169968
beta-alanine	0.00214584	0.00431487	0.0411691	0.0158766	0.00671766	0	0	0.00223922	0.00915896	0.0158766	0.0158766	0.0136374
malic acid	0.0574479	0.0590072	0.200389	0.105615	0.0574999	0.0335594	0.0480116	0.0463569	0.0481148	0.0720554	0.0576032	0.0592578
aspartic acid	0.401177	0.462238	2.50922	1.12421	0.56829	0.0351689	0.0100358	0.204498	0.555923	1.08904	1.11418	0.919715
GABA	0.00452305	0.0123495	0.00194278	0.00627178	0.0189479	0	0	0.00631597	-0.0126761	0.00627178	0.00627178	-4.41979e-05
glutamic acid 3	2.4849	2.31268	5.95779	3.58513	2.88476	1.98275	1.06609	1.97787	0.700361	1.60238	2.51903	1.60726
creatinine	0.224183	0.263634	0.496166	0.327994	0.343907	0.0213673	0	0.121758	-0.0159125	0.306627	0.327994	0.206236
glutamine	0.0507274	0.021701	0.556733	0.209721	0.00978396	0	0	0.00326132	0.199937	0.209721	0.209721	0.206459
glutamate	0.594293	1.02712	5.2022	2.27454	1.25012	0.0178977	0	0.422672	1.02442	2.25664	2.27454	1.85186
N-acetyl-aspartic acid	0.0375362	0.0440666	0.134573	0.0720587	0.0497132	0.0325474	0.0588213	0.0470273	0.0223455	0.0395113	0.0132374	0.0250314
xylose	0.00224741	0.00280298	0.0154806	0.00684368	0.0039807	0.142825	0.0199377	0.0555811	0.00286298	-0.135981	-0.013094	-0.0487374
taurine	0.0252961	0.0155313	2.57167	0.870834	0.0277326	0	0	0.00924422	0.843101	0.870834	0.870834	0.861589
ribose	0.022454	0.0600731	0.242882	0.10847	0.134336	0.117226	0.219296	0.156953	-0.0258662	-0.00875685	-0.110827	-0.0484832
arabinose	0.00224741	0.00280298	0.0154806	0.00684368	0.0039807	0.142825	0.0199377	0.0555811	0.00286298	-0.135981	-0.013094	-0.0487374
arabitol	0.00269982	0.0017719	0.00796364	0.00414512	0.00102293	0	0	0.000340977	0.00312219	0.00414512	0.00414512	0.00380414
fucose	0	0	0	0	0	0	0	0	0	0	0	0
dihydroxyacetone phosphate	0.000687583	0	0.00769632	0.00279463	0	0	0	0	0.00279463	0.00279463	0.00279463	0.00279463
glycerol-1-phosphate	0.0332761	0.0339429	0.106966	0.0580617	0.0364014	0	0.00491424	0.0137719	0.0216604	0.0580617	0.0531475	0.0442899
o-phosphocolamine	0.101873	0.124118	0.325485	0.183825	0.214667	0.0311981	0	0.081955	-0.0308416	0.152627	0.183825	0.10187
methyl-beta-d-galatopyranoside	0.0454	0.00475308	0.00891963	0.0196909	0.00182132	0	0	0.000607105	0.0178696	0.0196909	0.0196909	0.0190838
hypoxanthine	0.418945	0.42999	1.33604	0.728324	1.00673	0.0746267	0	0.360453	-0.278407	0.653697	0.728324	0.367872
citric acid	0.0508268	0.037982	0.165836	0.0848816	0.00671267	0	0.00140369	0.00270545	0.078169	0.0848816	0.0834779	0.0821762
dehydroascorbic acid	0.0671463	0.0372592	0.161717	0.0887076	0.0201343	0.014669	0.0248598	0.0198877	0.0685733	0.0740386	0.0638478	0.0688199
adenine	0.340943	0.487421	0.904389	0.577584	1.58921	0.0443442	0	0.544516	-1.01162	0.53324	0.577584	0.0330677
tyrosine	0.0255964	0.0339754	0.00138943	0.0203204	0.0333313	0.0338485	0.00215146	0.0231104	-0.0130109	-0.0135281	0.018169	-0.00279001
glucose	0.781512	0.992988	4.43414	2.06955	0.306722	0.25103	0.236878	0.264877	1.76282	1.81852	1.83267	1.80467
lysine	0.0141307	0.0105316	0.0570832	0.0272485	0.0202378	0	0	0.00674594	0.00701072	0.0272485	0.0272485	0.0205026
fructose	0.0222476	0.0359703	0.174431	0.0775497	0.0198324	0.0183699	0.0216221	0.0199415	0.0577173	0.0591797	0.0559276	0.0576082
mannose	0.0096821	0.0371146	0.0797673	0.042188	0.068459	0.0598613	0.0320173	0.0534459	-0.026271	-0.0176733	0.0101707	-0.0112579
tyrosine1	1.14974	0.798689	5.2168	2.38841	1.05988	0.0487584	0.00338198	0.370674	1.32853	2.33965	2.38503	2.01774
galactose	0.124575	0.164153	0.718349	0.335693	0.0637099	0.0618371	0.0450992	0.0568821	0.271983	0.273855	0.290593	0.278811
sorbitol	0.0178321	0.00864319	0.0398699	0.0221151	0.0187284	0.0117487	0.00548883	0.0119886	0.00338669	0.0103664	0.0166262	0.0101264
pamtothenic acid	0.0126046	0.0122688	0.0556718	0.0268484	0.0108393	0.0072381	0.0101302	0.00940254	0.0160091	0.0196103	0.0167182	0.0174458
palmitate	0.181912	0.181734	0.643403	0.335683	0.645816	1.8822	0.565686	1.03123	-0.310133	-1.54651	-0.230003	-0.69555
NAM	0.0185935	0.0283504	0.129912	0.058952	0.0489435	0.0201048	0.0290578	0.032702	0.0100085	0.0388473	0.0298943	0.02625
myo-inositol	0.00825045	0.00831593	0.0197611	0.0121092	0.00944839	0.0156713	0.0184684	0.0145294	0.00266079	-0.00356214	-0.00635923	-0.0024202
uric acid	0.817879	0.489074	0.0983998	0.468451	0.883383	0.191236	0	0.358206	-0.414932	0.277215	0.468451	0.110245
unknown sugar 1	0.551605	0.711675	0.0182969	0.427192	1.21719	0.0937484	0	0.43698	-0.79	0.333444	0.427192	-0.00978786
oleic acid	0.0392319	0.014545	0.146737	0.066838	0.103166	0.0625889	0.0536788	0.0731447	-0.0363283	0.00424914	0.0131592	-0.00630664
stearic acid	0.0886634	0.0774861	0.260851	0.142333	0.253481	0.631604	0.215977	0.367021	-0.111148	-0.489271	-0.0736438	-0.224687
glucose 6 phosphate	0.0598496	0.0470758	0.172436	0.0931203	0.0711486	0.0118547	0.00472795	0.0292437	0.0219717	0.0812656	0.0883923	0.0638766
6-phosphogluconic acid	0.0199964	0.0118642	0.0441119	0.0253242	0.0220329	0.0138015	0.00481454	0.0135497	0.00329124	0.0115226	0.0205096	0.0117745
uridine	0.00432645	0.00198036	0.0100967	0.00546785	0.00324469	0	0	0.00108156	0.00222316	0.00546785	0.00546785	0.00438629
inosine	0.0253156	0.0129681	0.0646068	0.0342969	0.0308364	0.0758989	0	0.0355784	0.0034605	-0.041602	0.0342969	-0.00128155
sucrose	0.00823524	0.0320499	0.0430734	0.0277862	0.0355768	0.278595	0.0387603	0.117644	-0.00779058	-0.250808	-0.0109741	-0.0898577
maltose	0.0240382	0.0310525	0.156244	0.070445	0.0649	0.121284	0.0323295	0.0728378	0.00554503	-0.050839	0.0381154	-0.00239285
inosine 5 monophosphate	0.0105076	0.0049111	0.00444001	0.00661958	0.00711935	0	0	0.00237312	-0.000499765	0.00661958	0.00661958	0.00424647
AXP	0.0187135	0.0214511	0.020968	0.0203775	0.0414474	0	0	0.0138158	-0.0210699	0.0203775	0.0203775	0.00656172
cholesterol	0.309903	0.124116	0.233569	0.222529	0.378678	0.419502	0.199765	0.332648	-0.156148	-0.196972	0.0227642	-0.110119
