# Supplementary material
Source: Preprints.org preprint supplement (doi:10.20944/preprints202106.0150.v1)
Supplement: Supplementary file 6 [file Xeno_Supplemental Figures.docx]

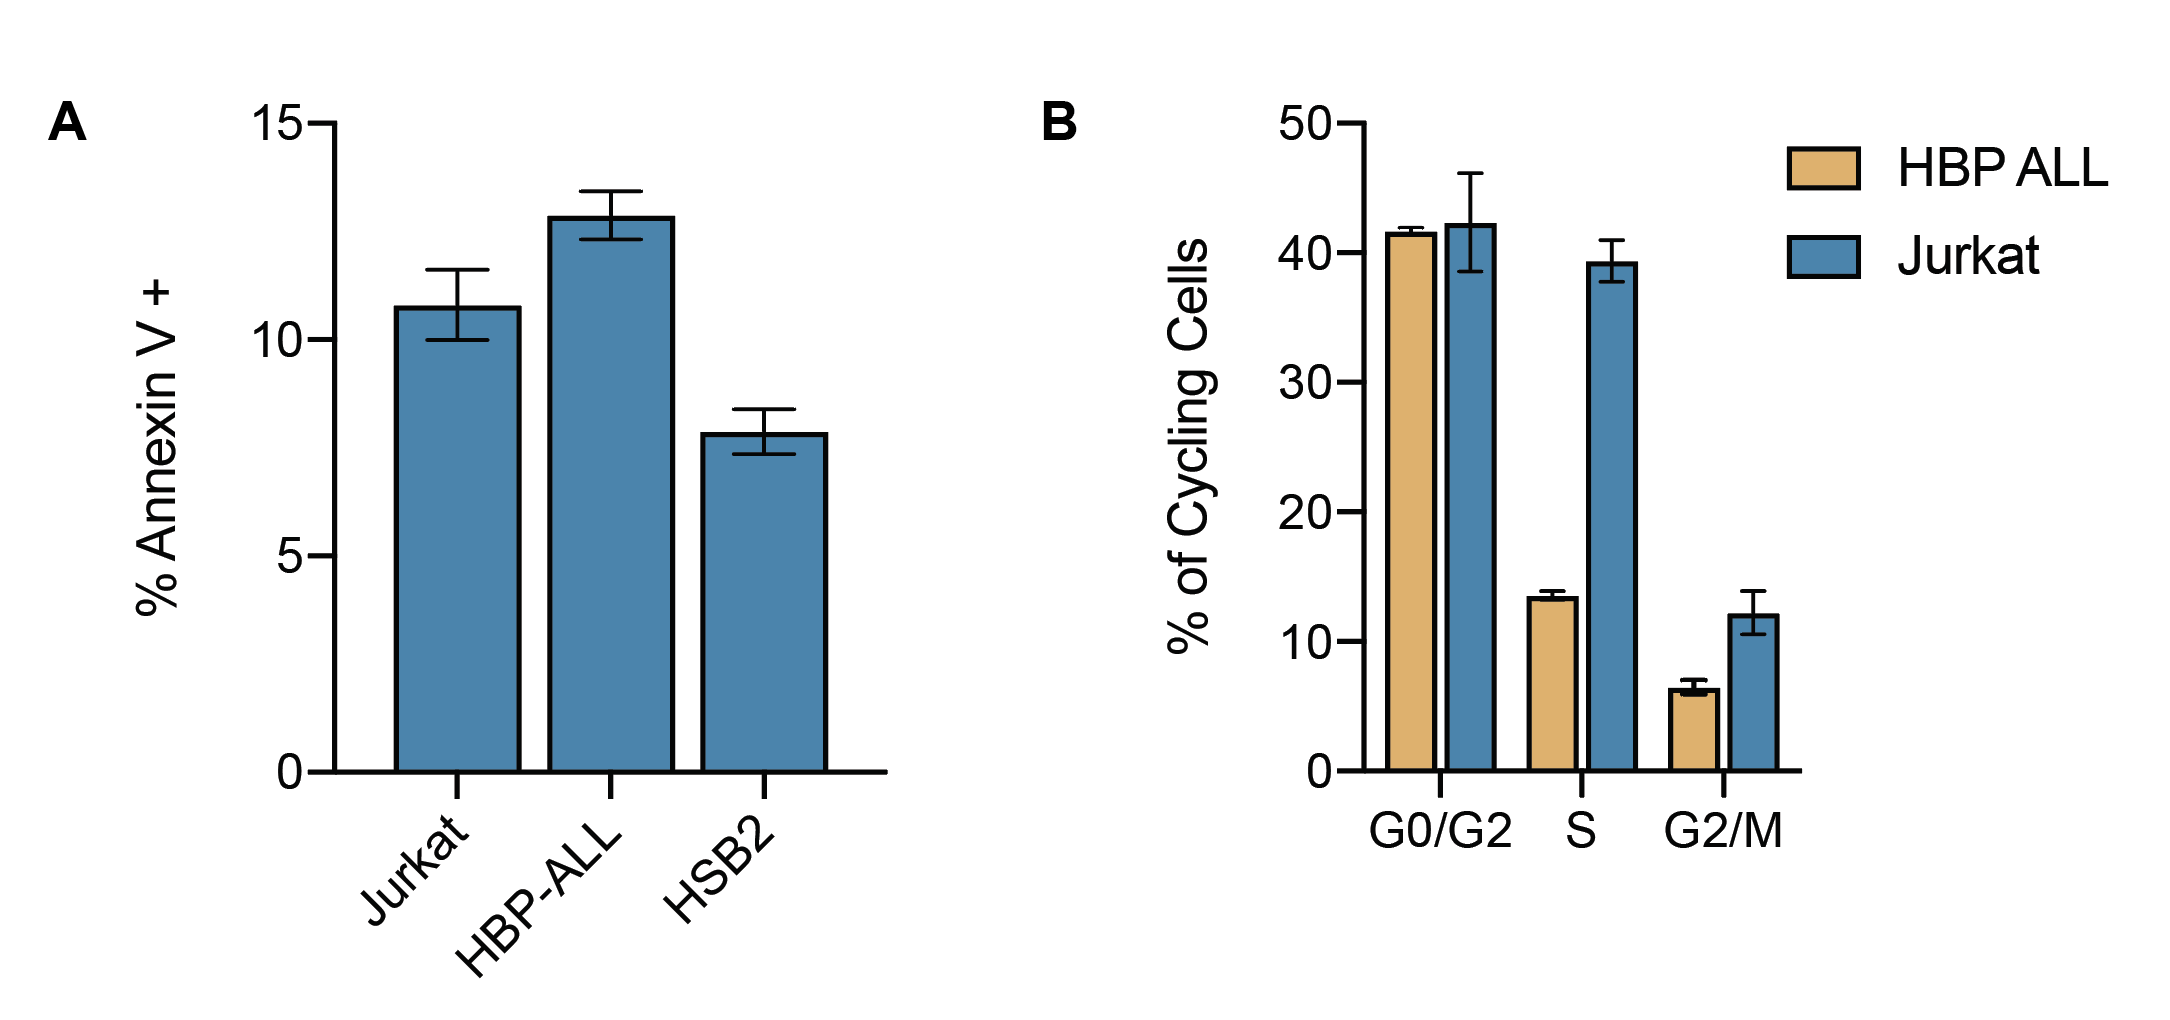


**Figure S1. Apoptosis and proliferation rates of cells stained with DiI.** The human T-ALL cell lines indicated were stained with DiI. *In* *vitro* analysis showed undergo apoptosis (A) as assessed by Annexin V staining, and are proliferative (B), as assessed by EdU staining. These data indicate that DiI staining of cell membranes does not interfere with cell growth or downstream cell labeling experiments *in vitro*.


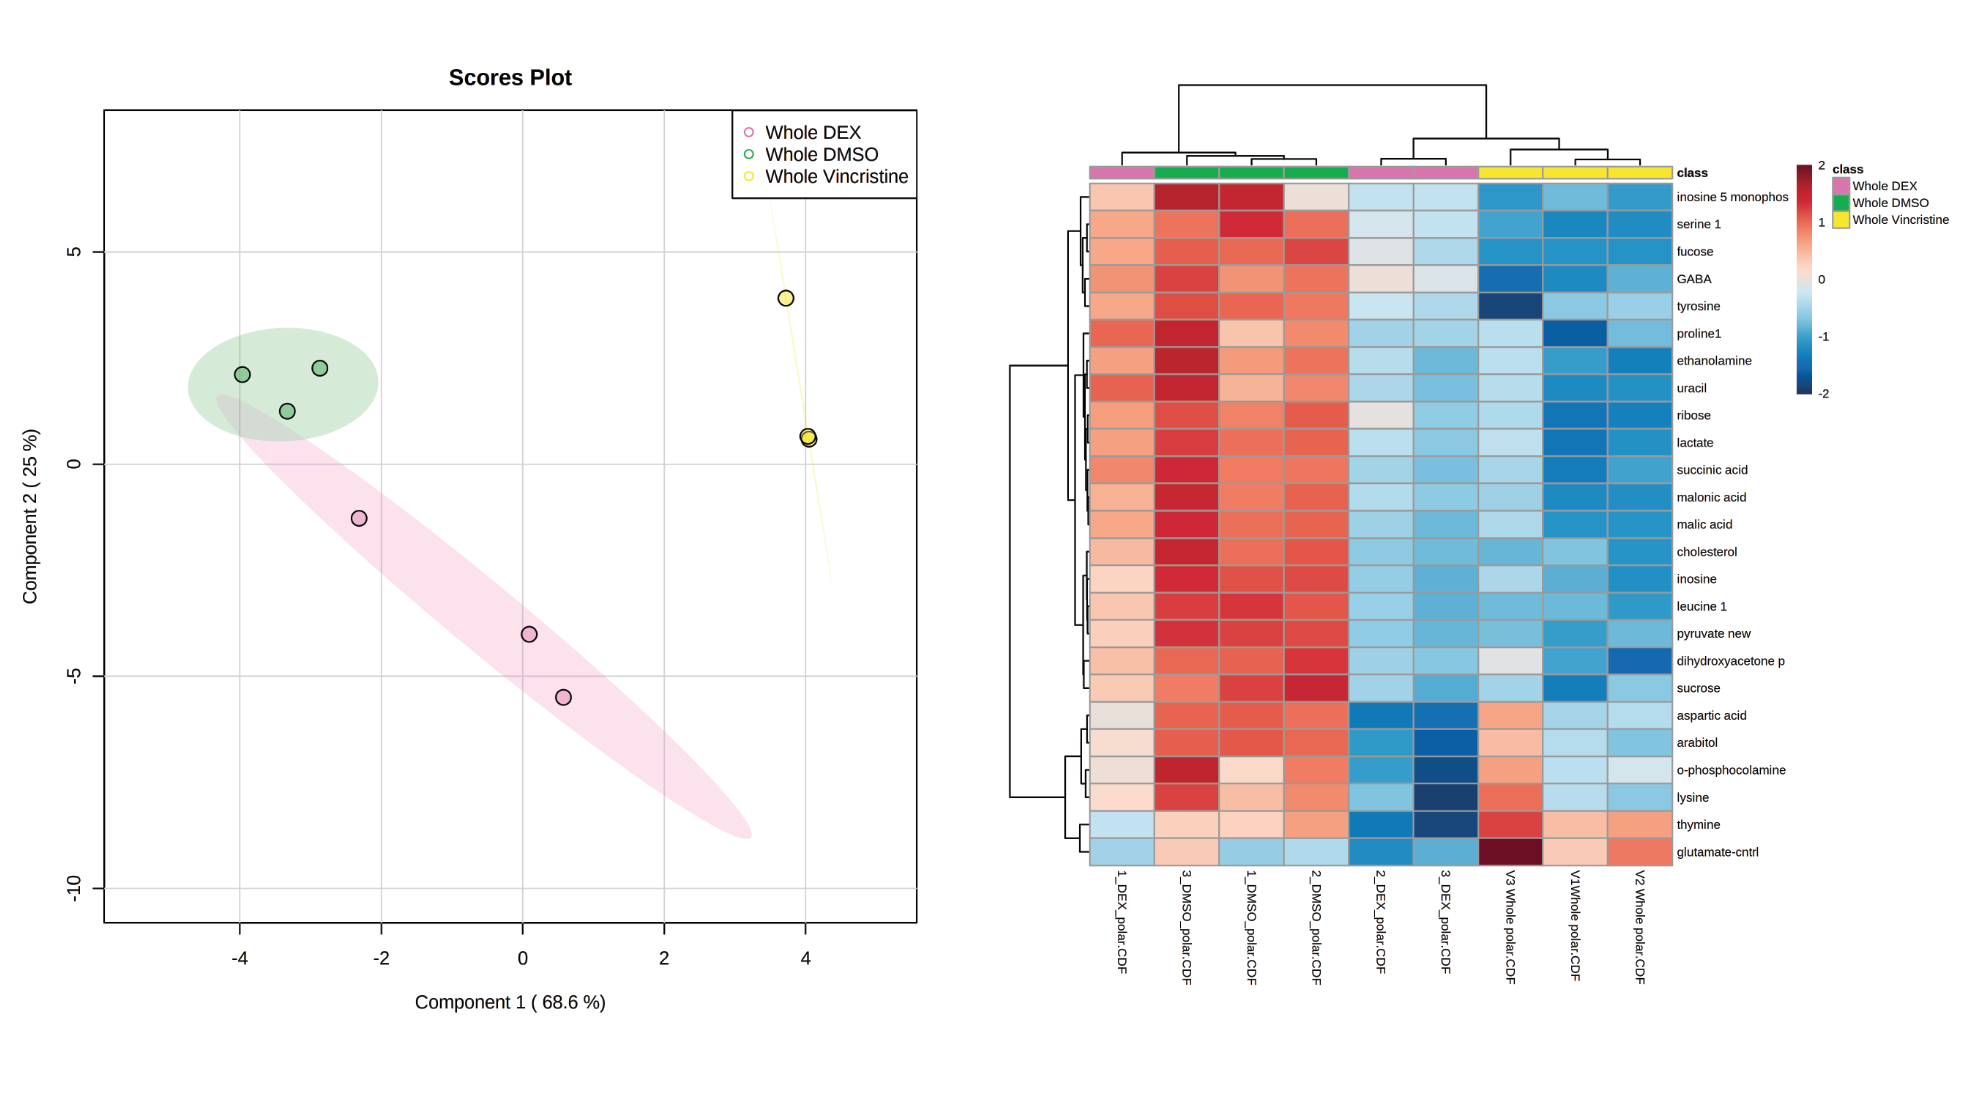


**Figure S2. Chemotherapy treatments cause metabolic shifts in zebrafish larvae.** Animals were treated with 10μM dexamethasone, 10μM vincristine, or DMSO in E3 media for 24hr and analyzed by GC-MS. Each drug caused metabolic changes in the animals, indicating the drug is well absorbed from the media into the larvae.
